# Supplementary material for: Effect of temperature on the air–water surface mechanical behavior of water-spread block copolymer micelles
Source: Royal Society of Chemistry journal article supplement (doi:10.1039/d3sm01003a), 2023-01-01

Electronic Supplementary Information (ESI) for  
**Effect of Temperature on the Air-Water Surface Mechanical Behavior of Water-Spread  
Block Copolymer Micelles**

Daniel J. Fesenmeier,<sup>1</sup> Seyoung Kim,<sup>1,2</sup> You-Yeon Won<sup>1,3,\*</sup>

<sup>1</sup> *Davidson School of Chemical Engineering, Purdue University, West Lafayette, IN 47907, USA*

<sup>2</sup> *Department of Polymer Science and Engineering, Dankook University, Yongin, Gyeonggi 16890,  
Republic of Korea*

<sup>3</sup> *Purdue University Institute for Cancer Research, West Lafayette, IN 47907, USA*

\* *Corresponding author. Email: yywon@purdue.edu*

**Keywords:** amphiphilic block copolymer micelle, Langmuir monolayer, surface pressure–area isotherm, poly(styrene)–poly(ethylene glycol), Brewster angle microscopy, glass transition

**Figure S1:** TEM images for PS-PEG and PtBMA-PEG micelles

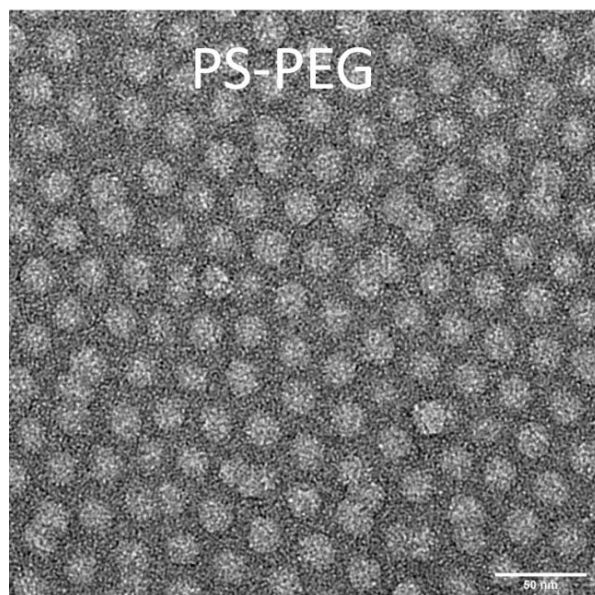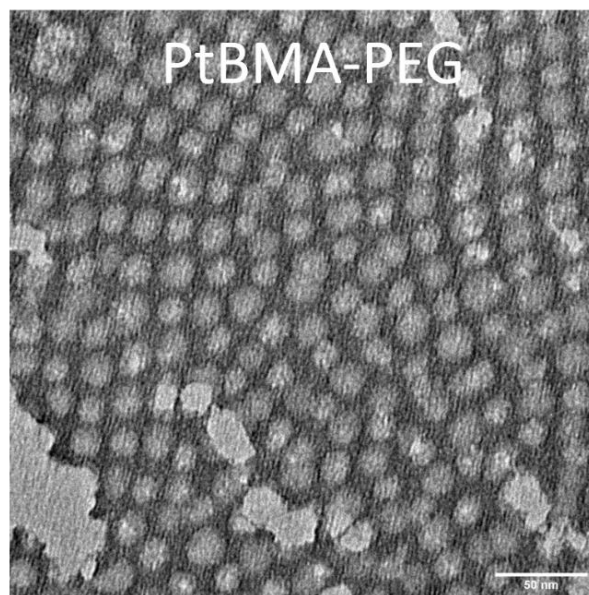

**Figure S2:** Surface pressure-area isotherm plotted in terms of area per PtBMA monomer unit for isotherm conducted at 40°C. Spreading was done using 50  $\mu\text{L}$  of 5 mg/mL of PtBMA-PEG aqueous micelle solution and compression speed was 30 mm/min.

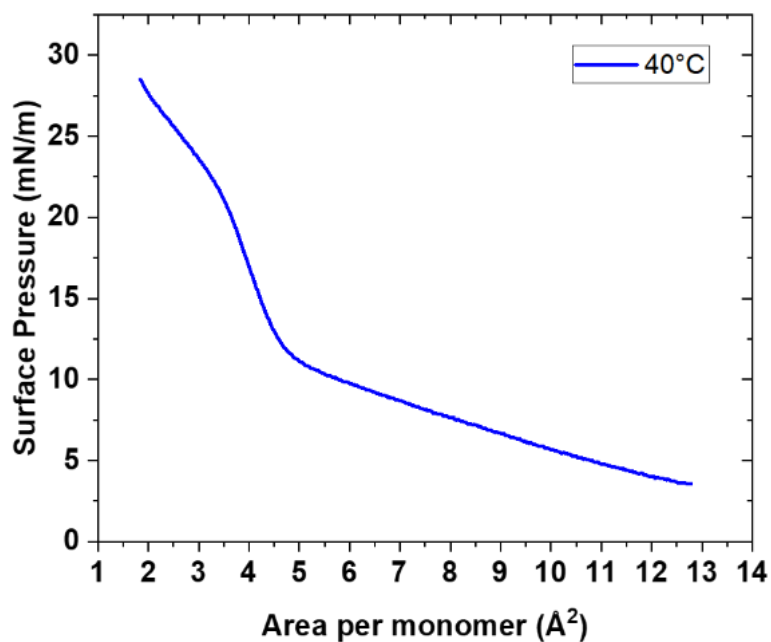

**Figure S3:** The first derivate of surface pressure with respect to temperature obtained from heating of monolayer compressed to 25 mN/m at constant area for water-spread PS-PEG and PtBMA-PEG micelle solutions shown in Figure 7 of the main text. The core  $T_{g,SP}$  is estimated by interpolation of the temperature at which the first derivative is equal to zero.

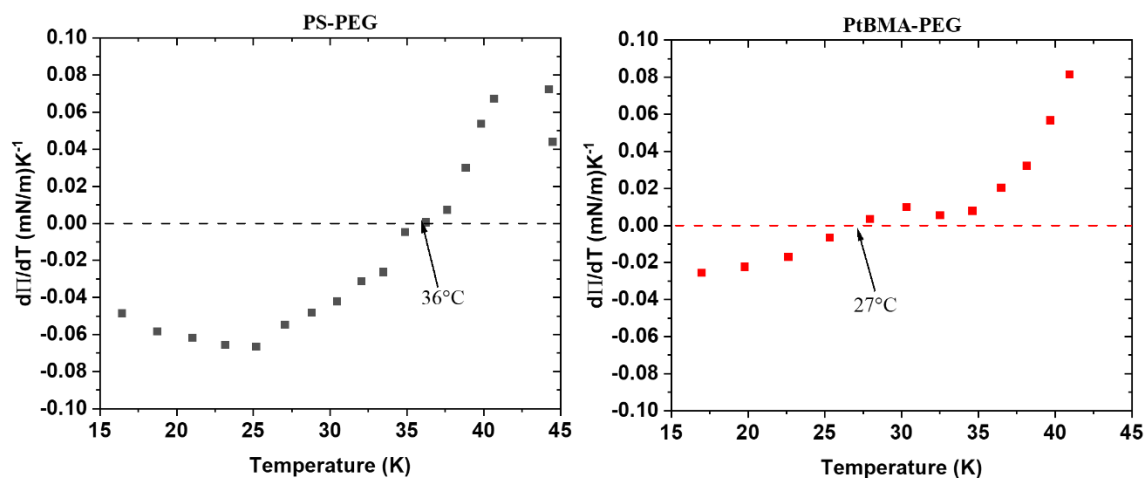

**Figure S4:** DLS hydrodynamic diameter as a function of temperature for PS-PEG and PtBMA-PEG micelles in water at 1 mg/mL.

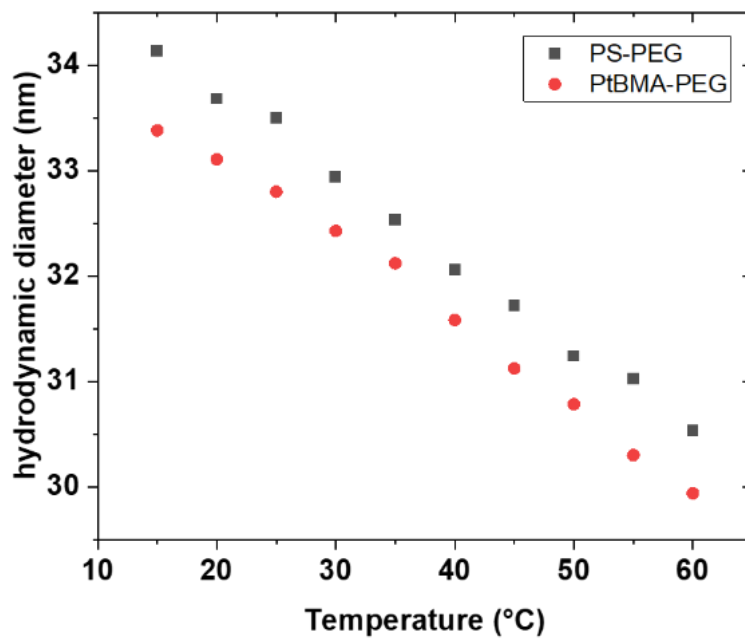

Supplement: d3sm01003a1.pdf [file d3sm01003a1.pdf]
